# Supplementary material
Source: Springer Nature journal article supplement (https://www.springermedizin.de/resource/supplementary/13052_2013_283_MOESM3_ESM.pdf/9671768)

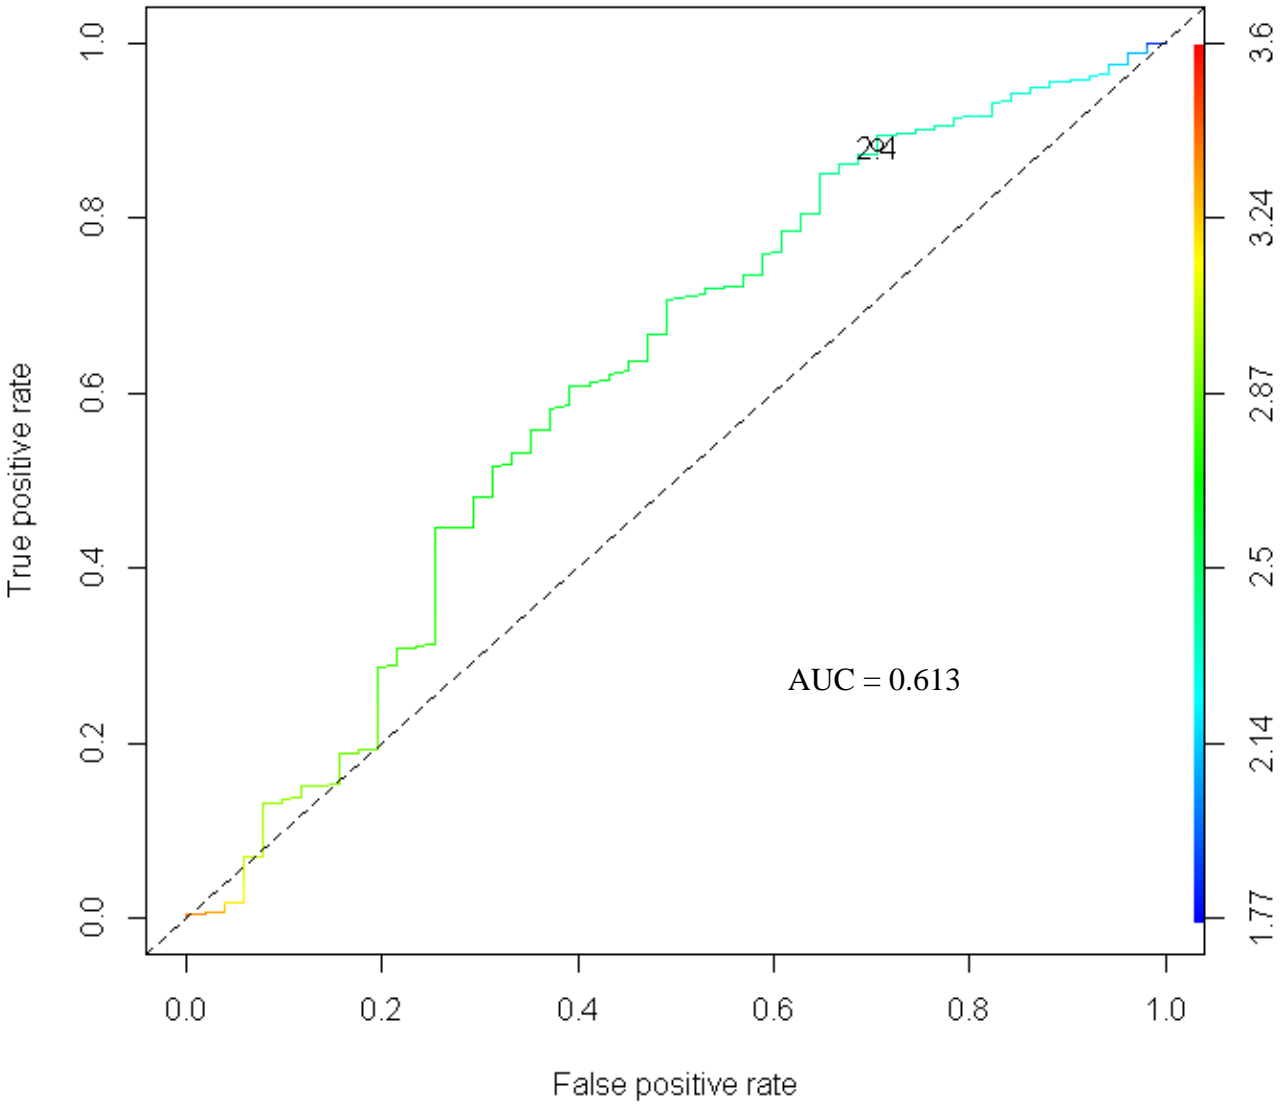

Supplement: MOESM3 [file 9671768]
